# Supplementary material
Source: MDPI journal article supplement (https://www.mdpi.com/2077-0472/13/2/509)
Supplement: s1 [file s1]

**Supplemental Table S1** Optimized UPLC-MS/MS parameters for the quantification of phytohormones.

| No. | Compound | Scan Mode (ESI) | MRM transition | <sup>1</sup> RT (min) | <sup>2</sup> CV(V) | <sup>3</sup> CE (eV) |
|-----|----------|-----------------|----------------|-----------------------|--------------------|----------------------|
| 1   | ABA      | -               | 263.1>153.0    | 7.07                  | 30                 | 10                   |
| 2   | tZR      | +               | 352.0>220.0    | 2.63                  | 30                 | 17                   |
| 3   | CA       | +               | 465.3>429.4    | 9.64                  | 27                 | 17                   |
| 4   | TY       | +               | 449.4>431.4    | 10.91                 | 20                 | 15                   |
| 5   | IAA      | +               | 176.0>130.0    | 5.83                  | 30                 | 16                   |
| 6   | SA       | -               | 137.0>93.0     | 5.47                  | 25                 | 15                   |
| 7   | tZ       | +               | 220.0>136.0    | 2.06                  | 30                 | 16                   |
| 8   | GA3      | -               | 345.0>143.1    | 4.72                  | 28                 | 15                   |

<sup>1</sup> RT, retention time; <sup>2</sup> CV, cone voltage; <sup>3</sup> CE, collision energy.

**Supplemental Table S2** Primer sequences of the genes for qPCR verification.

| Name        | Primer  | Sequence                       |
|-------------|---------|--------------------------------|
| ACTIN       | Forward | 5'-CTTGCACCAAGCAGCATGAA-3'     |
|             | Reverse | 5'-CCGATCCAGACACTGTACTTCCTT-3' |
| Pg_S1335.25 | Forward | 5'-TTGCAGGCAATATCGTCGTG-3'     |
|             | Reverse | 5'-GCAGGCCAGGGTAAGATTTG-3'     |
| Pg_S5688.1  | Forward | 5'-GCTACTCCACCATCTACGCT-3'     |
|             | Reverse | 5'-CTCATAGAGGCTCGTCGACC-3'     |
| Pg_S1157.44 | Forward | 5'-TGCAGCAGTTTGATTGGGAA-3'     |
|             | Reverse | 5'-GTGGCTTGAATTTGTTCCGC-3'     |
| Pg_S0988.8  | Forward | 5'-GATCCGTCTACATGGCCAGA-3'     |
|             | Reverse | 5'-ATCGCCACTGGTAGACACAA-3'     |
| Pg_S6254.1  | Forward | 5'-CGTCTCGTGTTGGCTAATGG-3'     |
|             | Reverse | 5'-CTCAACCAGTCCCACTCAGT-3'     |
| Pg_S4448.3  | Forward | 5'-ACCCTCTTTGCAAGCCTAGT-3'     |
|             | Reverse | 5'-AACTCGAAGCACATCTCCCA-3'     |
| Pg_S7224.4  | Forward | 5'-CACCAGTTTTGTGCCGATCA-3'     |
|             | Reverse | 5'-CGACTTTCCCAGCAAACGAA-3'     |
| Pg_S1395.27 | Forward | 5'-GGTGGTGATGGAGGAGTGAA-3'     |
|             | Reverse | 5'-CTATCAACCCTCGGCATTGC-3'     |

**Supplemental Table S3.** Differential metabolites in ginseng leaves identified by metabolomics analysis based on the UPLC-QTOF/MS.

| Mode   | Rt <sup>a</sup> | m/z      | Adduct                               | Metabolite                                 | Fold Change <sup>b</sup> | p-value | VIP    |
|--------|-----------------|----------|--------------------------------------|--------------------------------------------|--------------------------|---------|--------|
| ESI(-) | 26.99           | 515.3037 | (M-H) <sup>-</sup>                   | Adynerin                                   | 2.897                    | 0.030   | 1.510  |
|        | 31.97           | 317.1409 | (M+CH <sub>3</sub> COO) <sup>-</sup> | 3-Deoxy-2-keto-6-phosphogluconic acid      | 4.515                    | 0.023   | 1.342  |
|        | 39.32           | 293.2119 | (M-H) <sup>-</sup>                   | 13-OxoODE                                  | 2.518                    | 0.021   | 3.987  |
|        | 39.75           | 295.2275 | (M-H) <sup>-</sup>                   | 9(S)-HODE                                  | 2.679                    | 0.000   | 2.884  |
|        | 47.79           | 339.3252 | (M-H) <sup>-</sup>                   | Behenic acid                               | 2.607                    | 0.011   | 1.060  |
|        | 52.88           | 98.00013 | (M+K-2H) <sup>-</sup>                | Ethanolamine                               | 5.805                    | 0.002   | 1.382  |
|        | 57.55           | 115.0027 | (M-H) <sup>-</sup>                   | Fumarate                                   | 0.601                    | 0.014   | 1.017  |
|        | 79.19           | 89.02397 | (M-H) <sup>-</sup>                   | 3-Hydroxypropionic acid (beta-lactic acid) | 0.463                    | 0.017   | 1.679  |
|        | 120.17          | 124.9873 | (M+Na-2H) <sup>-</sup>               | Malonic acid                               | 0.490                    | 0.026   | 1.664  |
|        | 121.04          | 71.01332 | (M-H) <sup>-</sup>                   | Pyruvaldehyde                              | 0.540                    | 0.036   | 1.501  |
|        | 122.08          | 173.0095 | (M-H) <sup>-</sup>                   | Dehydroascorbic acid (Oxidized vitamin C)  | 0.406                    | 0.004   | 10.132 |
|        | 126.01          | 193.0495 | (M-H) <sup>-</sup>                   | Scytalone                                  | 4.825                    | 0.004   | 1.480  |
|        | 146.70          | 195.0649 | (M-H) <sup>-</sup>                   | Xanthoxylin                                | 4.859                    | 0.000   | 1.031  |
|        | 149.93          | 255.2318 | (M-H) <sup>-</sup>                   | Palmitic acid                              | 0.559                    | 0.036   | 2.224  |
|        | 167.49          | 191.0192 | (M-H <sub>2</sub> O-H) <sup>-</sup>  | D-Galactarate                              | 0.566                    | 0.013   | 2.257  |
|        | 169.28          | 134.047  | (M-H) <sup>-</sup>                   | Adenine                                    | 1.347                    | 0.039   | 1.571  |
|        | 178.04          | 191.0562 | (M-H) <sup>-</sup>                   | Quinate                                    | 3.286                    | 0.015   | 6.710  |
|        |                 |          |                                      | 1-Palmitoyl-2-linoleoyl-sn-glycero-3-      |                          |         |        |
|        | 189.30          | 671.4677 | (M-H) <sup>-</sup>                   | phosphate                                  | 1.800                    | 0.004   | 8.936  |
|        | 194.94          | 223.0815 | (M+CH <sub>3</sub> COO) <sup>-</sup> | L-Rhamnose                                 | 2.443                    | 0.035   | 1.131  |
|        | 200.92          | 843.5146 | (M+CH <sub>3</sub> COO) <sup>-</sup> | Ginsenoside Rg3                            | 1.919                    | 0.015   | 5.674  |
|        | 226.54          | 213.1235 | (M-H) <sup>-</sup>                   | d-Dethiobiotin                             | 5.147                    | 0.003   | 1.207  |
|        | 238.56          | 209.1174 | (M+Na-2H) <sup>-</sup>               | 3-Hydroxycapric acid                       | 0.480                    | 0.022   | 1.244  |
|        | 255.53          | 147.0447 | (M-H <sub>2</sub> O-H) <sup>-</sup>  | Tropic acid                                | 34.211                   | 0.043   | 3.182  |
|        | 255.53          | 164.0717 | (M-H) <sup>-</sup>                   | L-Phenylalanine                            | 33.465                   | 0.045   | 9.748  |
|        | 256.41          | 131.0341 | (M-H <sub>2</sub> O-H) <sup>-</sup>  | D-Lyxose                                   | 0.546                    | 0.006   | 1.515  |
|        | 256.47          | 149.0449 | (M-H) <sup>-</sup>                   | D-Ribose                                   | 0.530                    | 0.005   | 2.347  |

|        |          |                                      |                         |        |       |        |
|--------|----------|--------------------------------------|-------------------------|--------|-------|--------|
| 257.80 | 203.0828 | (M-H) <sup>-</sup>                   | L-Tryptophan            | 18.447 | 0.012 | 6.885  |
| 257.80 | 383.15   | M <sup>-</sup>                       | N-Acetyl-D-lactosamine  | 4.109  | 0.020 | 4.403  |
| 258.36 | 239.0763 | (M+CH <sub>3</sub> COO) <sup>-</sup> | D-Fructose              | 0.358  | 0.000 | 2.292  |
| 259.11 | 71.0133  | (M-H <sub>2</sub> O-H) <sup>-</sup>  | Dihydroxyacetone        | 0.448  | 0.003 | 2.044  |
| 270.85 | 130.0875 | (M-H) <sup>-</sup>                   | L-Norleucine            | 10.836 | 0.007 | 7.976  |
| 271.72 | 218.1041 | (M-H) <sup>-</sup>                   | Pantothenate            | 4.243  | 0.009 | 4.302  |
| 274.24 | 945.5471 | (M-H) <sup>-</sup>                   | Ginsenoside Re          | 1.810  | 0.027 | 4.802  |
| 294.05 | 359.1177 | (2M-H) <sup>-</sup>                  | D-Allose                | 0.338  | 0.004 | 1.664  |
| 294.38 | 239.0769 | (M+CH <sub>3</sub> COO) <sup>-</sup> | D-Mannose               | 0.488  | 0.012 | 2.117  |
| 294.71 | 181.0702 | (M+CH <sub>3</sub> COO) <sup>-</sup> | D-Threitol              | 7.006  | 0.002 | 2.243  |
| 298.02 | 116.0715 | (M-H) <sup>-</sup>                   | L-Valine                | 61.358 | 0.049 | 5.315  |
| 299.33 | 105.0196 | (M-H) <sup>-</sup>                   | Glyceric acid           | 0.534  | 0.001 | 10.846 |
| 329.94 | 191.0194 | (M-H <sub>2</sub> O-H) <sup>-</sup>  | D-Glucarate             | 5.686  | 0.017 | 2.065  |
| 330.69 | 172.0975 | (M-H) <sup>-</sup>                   | Acetyl-DL-Leucine       | 13.311 | 0.006 | 2.181  |
| 348.50 | 141.0162 | (M-H <sub>2</sub> O-H) <sup>-</sup>  | 2-Oxoadipic acid        | 0.489  | 0.003 | 2.159  |
| 348.85 | 118.0504 | (M-H) <sup>-</sup>                   | L-Threonine             | 9.646  | 0.004 | 2.181  |
| 349.31 | 158.082  | (M-H) <sup>-</sup>                   | Acetyl-DL-Valine        | 5.877  | 0.008 | 1.240  |
| 350.79 | 327.1298 | (2M-H) <sup>-</sup>                  | L-Fucose                | 1.987  | 0.013 | 1.925  |
| 369.96 | 145.0624 | (M-H) <sup>-</sup>                   | L-Glutamine             | 5.607  | 0.001 | 7.203  |
| 369.96 | 127.0511 | (M-H) <sup>-</sup>                   | Dihydrothymine          | 5.323  | 0.001 | 2.989  |
| 371.82 | 195.0516 | (M-H) <sup>-</sup>                   | Galactonic acid         | 2.760  | 0.000 | 5.373  |
| 372.59 | 131.0468 | (M-H) <sup>-</sup>                   | L-Asparagine            | 16.346 | 0.000 | 7.828  |
| 372.59 | 113.0357 | (M-H) <sup>-</sup>                   | Dihydrouracil           | 16.212 | 0.000 | 5.091  |
| 372.59 | 114.0196 | (M-H) <sup>-</sup>                   | Maleamic acid           | 14.221 | 0.000 | 3.369  |
| 374.61 | 154.0618 | (M-H) <sup>-</sup>                   | L-Histidine             | 21.545 | 0.036 | 1.703  |
| 378.89 | 306.0758 | (M-H) <sup>-</sup>                   | Glutathione             | 8.240  | 0.013 | 1.888  |
| 379.66 | 135.0301 | (M-H) <sup>-</sup>                   | L-Threonate             | 0.387  | 0.007 | 2.688  |
| 429.53 | 606.0732 | (M-H) <sup>-</sup>                   | UDP-N-acetylglucosamine | 3.525  | 0.004 | 1.000  |
| 430.71 | 171.0062 | (M-H) <sup>-</sup>                   | Glycerol 3-phosphate    | 4.482  | 0.025 | 1.433  |
| 433.96 | 133.0141 | (M-H) <sup>-</sup>                   | L-Malic acid            | 0.612  | 0.008 | 1.636  |

|        |        |           |                                         |                                          |        |       |        |
|--------|--------|-----------|-----------------------------------------|------------------------------------------|--------|-------|--------|
| ESI(+) | 438.96 | 173.009   | (M-H) <sup>-</sup>                      | cis-Aconitate                            | 4.609  | 0.049 | 1.595  |
|        | 439.04 | 129.0188  | (M-H) <sup>-</sup>                      | Mesaconic acid                           | 4.397  | 0.049 | 1.750  |
|        | 440.74 | 300.0483  | (M-H) <sup>-</sup>                      | N-Acetylglucosamine 1-phosphate          | 5.208  | 0.031 | 1.429  |
|        | 475.53 | 242.0794  | (M+CH <sub>3</sub> COO) <sup>-</sup>    | Phosphorylcholine                        | 4.503  | 0.003 | 1.450  |
|        | 477.13 | 191.0203  | (M-H) <sup>-</sup>                      | Citrate                                  | 2.856  | 0.046 | 4.712  |
|        | 522.43 | 173.1043  | (M-H) <sup>-</sup>                      | L-Arginine                               | 5.778  | 0.001 | 1.953  |
|        | 52.70  | 322.27216 | (M+H) <sup>+</sup>                      | alpha-Linolenoyl ethanolamide            | 8.714  | 0.022 | 2.401  |
|        | 54.48  | 277.21578 | (M+H) <sup>+</sup>                      | Stearidonic Acid                         | 1.939  | 0.008 | 6.702  |
|        | 58.30  | 279.23068 | (M+H) <sup>+</sup>                      | alpha-Linolenic acid                     | 2.015  | 0.000 | 3.520  |
|        | 71.51  | 295.22671 | (M+Na) <sup>+</sup>                     | 16-Hydroxypalmitic acid                  | 1.382  | 0.047 | 3.162  |
|        | 71.64  | 330.26214 | M <sup>+</sup>                          | Eicosapentaenoic Acid ethyl ester        | 2.053  | 0.000 | 3.704  |
|        |        |           |                                         | (4Z,7Z,10Z,13Z,16Z,19Z)-4,7,10,13,16,19- |        |       |        |
|        | 73.75  | 328.24669 | M <sup>+</sup>                          | Docosahexaenoic acid                     | 1.667  | 0.001 | 2.295  |
|        | 75.79  | 306.11608 | (M-H+2Na) <sup>+</sup>                  | Arg-Ser                                  | 0.381  | 0.003 | 1.145  |
|        | 96.91  | 250.09153 | (M+H-H <sub>2</sub> O) <sup>+</sup>     | Adenosine                                | 3.009  | 0.024 | 1.157  |
|        | 111.19 | 247.13122 | (M+H-H <sub>2</sub> O) <sup>+</sup>     | Abcisic Acid (cis,trans)                 | 2.391  | 0.011 | 1.065  |
|        | 126.46 | 325.1987  | (M+K) <sup>+</sup>                      | Retinol (Vitamin A)                      | 0.482  | 0.025 | 3.142  |
|        | 138.39 | 229.14215 | (M+CH <sub>3</sub> COO+2H) <sup>+</sup> | Jasmine lactone                          | 0.464  | 0.007 | 2.492  |
|        | 162.28 | 280.16389 | (M+NH <sub>4</sub> ) <sup>+</sup>       | Pro-Phe                                  | 7.299  | 0.002 | 2.694  |
|        | 163.59 | 213.1467  | (M+CH <sub>3</sub> COO+2H) <sup>+</sup> | Limonene-1,2-epoxide                     | 1.651  | 0.009 | 1.528  |
|        | 164.11 | 313.27248 | (M+H-H <sub>2</sub> O) <sup>+</sup>     | 1-Palmitoylglycerol                      | 0.563  | 0.016 | 5.661  |
|        | 169.41 | 136.06031 | (M+H) <sup>+</sup>                      | Adenine                                  | 1.248  | 0.035 | 2.090  |
|        | 179.42 | 177.05301 | (M+H-H <sub>2</sub> O) <sup>+</sup>     | 3-Hydroxy-4-methoxycinnamic acid         | 20.104 | 0.005 | 5.098  |
|        | 187.70 | 522.35411 | (M+H) <sup>+</sup>                      | 1-Oleoyl-sn-glycero-3-phosphocholine     | 0.292  | 0.034 | 10.954 |
|        | 210.04 | 145.09587 | (M+CH <sub>3</sub> CN+H) <sup>+</sup>   | Dimethylglycine                          | 1.810  | 0.033 | 1.034  |
|        | 218.63 | 295.10168 | M <sup>+</sup>                          | Prunasin                                 | 1.373  | 0.048 | 1.648  |
|        | 254.98 | 222.09564 | (M+H) <sup>+</sup>                      | N-Acetyl-D-glucosamine                   | 13.309 | 0.037 | 1.291  |
|        | 255.10 | 149.05775 | (M+H-H <sub>2</sub> O) <sup>+</sup>     | Phenyllactic acid                        | 6.216  | 0.008 | 1.859  |
|        | 255.12 | 166.08472 | (M+H) <sup>+</sup>                      | L-Phenylalanine                          | 7.578  | 0.009 | 8.750  |
|        | 257.06 | 145.04766 | (M+Na) <sup>+</sup>                     | Erythritol                               | 0.406  | 0.003 | 2.199  |

|        |           |                                         |                                    |        |       |       |
|--------|-----------|-----------------------------------------|------------------------------------|--------|-------|-------|
| 257.56 | 205.09591 | (M+H) <sup>+</sup>                      | L-Tryptophan                       | 4.367  | 0.000 | 6.341 |
| 257.63 | 118.06341 | (M+H) <sup>+</sup>                      | Indole                             | 3.991  | 0.000 | 1.943 |
| 257.63 | 146.05828 | (M+H-2H <sub>2</sub> O) <sup>+</sup>    | DL-O-tyrosine                      | 3.531  | 0.000 | 2.824 |
| 257.64 | 170.05794 | (M+H-H <sub>2</sub> O) <sup>+</sup>     | Indoleacrylic acid                 | 3.679  | 0.000 | 1.256 |
| 261.02 | 152.05531 | (M+H) <sup>+</sup>                      | 2-Hydroxyadenine                   | 0.446  | 0.004 | 4.743 |
| 261.02 | 284.09717 | (M+H) <sup>+</sup>                      | Guanosine                          | 0.541  | 0.035 | 2.995 |
| 269.96 | 132.1002  | (M+H) <sup>+</sup>                      | L-Leucine                          | 10.673 | 0.000 | 4.428 |
| 272.54 | 220.11642 | (M+H) <sup>+</sup>                      | Pantothenate                       | 4.855  | 0.027 | 2.883 |
| 274.07 | 120.07913 | (M+H-H <sub>2</sub> O) <sup>+</sup>     | Tyramine                           | 9.195  | 0.003 | 4.583 |
| 298.58 | 147.04277 | (M+H-H <sub>2</sub> O) <sup>+</sup>     | trans-3-Coumaric acid              | 2.098  | 0.043 | 1.562 |
| 298.93 | 165.05353 | (M+H) <sup>+</sup>                      | trans-2-Hydroxycinnamic acid       | 5.922  | 0.001 | 4.448 |
| 298.93 | 136.07469 | (M+H-H <sub>2</sub> O) <sup>+</sup>     | Dopamine                           | 5.444  | 0.001 | 3.959 |
| 298.93 | 182.08042 | (M+H) <sup>+</sup>                      | L-Tyrosine                         | 5.563  | 0.001 | 4.897 |
| 299.76 | 188.06943 | (M+H-H <sub>2</sub> O) <sup>+</sup>     | DL-Indole-3-lactic acid            | 3.803  | 0.043 | 1.170 |
| 302.95 | 287.05324 | (M+H) <sup>+</sup>                      | Kaempferol                         | 2.287  | 0.025 | 1.203 |
| 348.61 | 120.06419 | (M+H) <sup>+</sup>                      | L-Threonine                        | 6.557  | 0.000 | 1.840 |
| 350.13 | 265.11085 | M <sup>+</sup>                          | Thiamine                           | 1.950  | 0.016 | 1.845 |
| 370.42 | 84.04389  | (M+H-H <sub>2</sub> O) <sup>+</sup>     | 1-Aminocyclopropanecarboxylic acid | 4.251  | 0.000 | 4.294 |
| 370.44 | 147.07537 | (M+NH <sub>4</sub> ) <sup>+</sup>       | L-Pyroglutamic acid                | 4.288  | 0.000 | 6.427 |
| 370.71 | 104.06986 | (M+H) <sup>+</sup>                      | 4-Aminobutyric acid                | 0.675  | 0.003 | 2.136 |
| 373.06 | 133.05978 | (M+H) <sup>+</sup>                      | L-Asparagine                       | 10.938 | 0.000 | 6.531 |
| 379.14 | 308.08947 | (M+H) <sup>+</sup>                      | Glutathione                        | 5.811  | 0.021 | 2.075 |
| 388.09 | 124.0388  | (M+H) <sup>+</sup>                      | Nicotinate                         | 4.234  | 0.005 | 5.727 |
| 388.80 | 156.07565 | (M+H) <sup>+</sup>                      | L-Histidine                        | 1.993  | 0.017 | 2.105 |
| 390.09 | 360.14761 | (M+NH <sub>4</sub> ) <sup>+</sup>       | Sucrose                            | 0.450  | 0.002 | 2.539 |
| 417.10 | 304.14853 | (M+CH <sub>3</sub> COO+2H) <sup>+</sup> | Agomelatine                        | 0.482  | 0.004 | 1.658 |
| 424.84 | 522.20124 | (M+NH <sub>4</sub> ) <sup>+</sup>       | Maltotriose                        | 0.430  | 0.040 | 1.739 |
| 448.57 | 277.13795 | (M+H) <sup>+</sup>                      | L-Saccharopine                     | 5.745  | 0.000 | 1.425 |
| 473.74 | 184.07322 | (M+H) <sup>+</sup>                      | Phosphorylcholine                  | 2.350  | 0.023 | 8.855 |
| 515.30 | 189.13391 | (M+H) <sup>+</sup>                      | L-NG-Monomethylarginine            | 3.753  | 0.005 | 5.523 |

|        |           |                                     |                                 |       |       |        |
|--------|-----------|-------------------------------------|---------------------------------|-------|-------|--------|
| 526.37 | 158.09088 | (M+H-H <sub>2</sub> O) <sup>+</sup> | L-Citrulline                    | 3.074 | 0.009 | 2.437  |
| 528.00 | 203.14902 | (M+H) <sup>+</sup>                  | NG,NG-dimethyl-L-arginine(ADMA) | 6.796 | 0.037 | 3.673  |
| 528.62 | 175.1186  | (M+H) <sup>+</sup>                  | L-Arginine                      | 2.205 | 0.018 | 14.004 |
| 529.35 | 147.11104 | (M+NH <sub>4</sub> ) <sup>+</sup>   | L-Pipecolic acid                | 2.597 | 0.026 | 1.546  |
| 555.97 | 189.15761 | (M+H) <sup>+</sup>                  | N6,N6,N6-Trimethyl-L-lysine     | 4.818 | 0.003 | 1.367  |

Rt<sup>a</sup>: retention time (sec); <sup>b</sup> Fold change was the ratio of average relative quantitation obtained from the diseased group (DL)/ control group (CL).

**Supplemental Table S4.** Differential metabolites in ginseng stems identified by metabolomics analysis based on the UPLC-QTOF/MS.

| Mode   | Rt <sup>a</sup> | m/z      | Adduct                               | Metabolite                                     | Fold Change <sup>b</sup> | p-value | VIP    |
|--------|-----------------|----------|--------------------------------------|------------------------------------------------|--------------------------|---------|--------|
| ESI(-) | 31.78           | 317.1408 | (M-H) <sup>-</sup>                   | Zearalenone                                    | 9.448                    | 0.040   | 1.262  |
|        | 39.53           | 255.2334 | (M-H) <sup>-</sup>                   | Palmitic acid                                  | 9.493                    | 0.001   | 11.764 |
|        | 39.99           | 339.3251 | (M-H) <sup>-</sup>                   | Behenic acid                                   | 12.934                   | 0.000   | 2.952  |
|        | 40.13           | 367.3566 | (M-H) <sup>-</sup>                   | Tetracosanoic acid                             | 16.834                   | 0.011   | 2.924  |
|        | 49.91           | 311.2934 | (M-H) <sup>-</sup>                   | Arachidic acid                                 | 6.215                    | 0.001   | 1.101  |
|        | 59.36           | 271.085  | (M-H) <sup>-</sup>                   | Arbutin                                        | 32.672                   | 0.033   | 2.518  |
|        | 61.10           | 295.2281 | (M-H) <sup>-</sup>                   | 9(S)-HODE                                      | 11.006                   | 0.038   | 10.737 |
|        | 62.15           | 293.2121 | (M-H) <sup>-</sup>                   | 9-OxoODE                                       | 5.546                    | 0.003   | 5.564  |
|        | 68.05           | 185.0117 | M <sup>-</sup>                       | 3-Phosphoserine                                | 3.207                    | 0.001   | 1.835  |
|        | 75.73           | 159.0656 | (M-H) <sup>-</sup>                   | 3,3-Dimethylglutaric acid                      | 7.916                    | 0.039   | 1.813  |
|        | 143.06          | 163.0393 | (M-H) <sup>-</sup>                   | 4-Hydroxycinnamic acid                         | 0.156                    | 0.002   | 1.228  |
|        | 143.40          | 257.0768 | (M-H) <sup>-</sup>                   | Ribothymidine                                  | 6.005                    | 0.000   | 1.068  |
|        | 150.98          | 279.2319 | (M-H) <sup>-</sup>                   | Linoleic acid                                  | 2.102                    | 0.005   | 1.021  |
|        | 187.12          | 133.0501 | (M+CH <sub>3</sub> COO) <sup>-</sup> | Hydroxyacetone                                 | 7.775                    | 0.011   | 2.439  |
|        | 187.24          | 671.4676 | (M-H) <sup>-</sup>                   | 1-Palmitoyl-2-linoleoyl-sn-glycero-3-phosphate | 1.378                    | 0.029   | 4.646  |
|        | 218.14          | 133.0502 | (M-H <sub>2</sub> O-H) <sup>-</sup>  | Ribitol                                        | 9.368                    | 0.003   | 1.988  |
|        | 230.28          | 147.0658 | (M-H) <sup>-</sup>                   | Mevalonic acid                                 | 3.795                    | 0.015   | 1.242  |
|        | 239.11          | 242.0774 | (M-H) <sup>-</sup>                   | Cytidine                                       | 3.241                    | 0.003   | 1.439  |
|        | 249.83          | 409.2343 | (M-H) <sup>-</sup>                   | 1-Palmitoyl Lysophosphatidic Acid              | 2.297                    | 0.036   | 1.168  |
|        | 257.73          | 203.0826 | (M-H) <sup>-</sup>                   | L-Tryptophan                                   | 3.251                    | 0.027   | 4.923  |
|        | 259.40          | 71.01338 | (M-H <sub>2</sub> O-H) <sup>-</sup>  | Dihydroxyacetone                               | 0.553                    | 0.009   | 1.523  |
|        | 261.90          | 282.0845 | (M-H) <sup>-</sup>                   | Guanosine                                      | 6.112                    | 0.013   | 3.622  |
|        | 262.65          | 105.0194 | (M-H) <sup>-</sup>                   | Glyceric acid                                  | 0.301                    | 0.034   | 4.466  |
|        | 263.17          | 239.0768 | (M+CH <sub>3</sub> COO) <sup>-</sup> | Alpha-D-Glucose                                | 0.586                    | 0.036   | 1.089  |
|        | 268.44          | 328.0453 | (M-H) <sup>-</sup>                   | Adenosine 3',5'-cyclic phosphate (cAMP)        | 5.222                    | 0.037   | 2.928  |
|        | 273.07          | 218.1042 | (M-H) <sup>-</sup>                   | Pantothenate                                   | 2.522                    | 0.017   | 3.644  |
|        | 281.45          | 148.0435 | (M-H) <sup>-</sup>                   | L-Methionine                                   | 0.176                    | 0.001   | 1.984  |

|        |          |                                      |                                      |        |       |        |
|--------|----------|--------------------------------------|--------------------------------------|--------|-------|--------|
| 294.50 | 161.045  | (M-H <sub>2</sub> O-H) <sup>-</sup>  | D-Tagatose                           | 0.511  | 0.001 | 2.423  |
| 294.53 | 239.0766 | (M+CH <sub>3</sub> COO) <sup>-</sup> | D-Mannose                            | 0.235  | 0.000 | 2.616  |
| 298.11 | 89.02417 | (M-H) <sup>-</sup>                   | DL-lactate                           | 0.297  | 0.008 | 2.524  |
| 299.59 | 128.0353 | (M-H) <sup>-</sup>                   | L-Pyroglutamic acid                  | 0.334  | 0.004 | 7.782  |
| 321.67 | 304.0329 | (M-H) <sup>-</sup>                   | Cytidine 2',3'-cyclic phosphate      | 4.451  | 0.007 | 1.413  |
| 323.15 | 344.0396 | (M-H) <sup>-</sup>                   | 3',5'-Cyclic guanosine monophosphate | 5.583  | 0.036 | 2.819  |
| 330.72 | 172.0975 | (M-H) <sup>-</sup>                   | Acetyl-DL-Leucine                    | 8.922  | 0.012 | 1.684  |
| 349.70 | 158.0819 | (M-H) <sup>-</sup>                   | Acetyl-DL-Valine                     | 9.792  | 0.022 | 1.208  |
| 358.07 | 159.0291 | (M-H) <sup>-</sup>                   | 2-Oxoadipic acid                     | 6.930  | 0.026 | 1.071  |
| 363.06 | 401.1305 | (M+CH <sub>3</sub> COO) <sup>-</sup> | Galactinol                           | 0.215  | 0.000 | 15.366 |
| 363.60 | 237.0614 | (M+CH <sub>3</sub> COO) <sup>-</sup> | 2-Dehydro-3-deoxy-D-gluconate        | 2.598  | 0.000 | 3.170  |
| 369.73 | 145.0624 | (M-H) <sup>-</sup>                   | L-Glutamine                          | 0.404  | 0.002 | 14.891 |
| 369.73 | 127.0515 | (M-H) <sup>-</sup>                   | Dihydrothymine                       | 0.437  | 0.003 | 6.054  |
| 369.73 | 125.035  | (M-H) <sup>-</sup>                   | Thymine                              | 0.457  | 0.004 | 1.300  |
| 370.37 | 177.0397 | (M-H) <sup>-</sup>                   | L-Gulonic gamma-lactone              | 4.367  | 0.026 | 1.608  |
| 371.24 | 161.0454 | (M-H) <sup>-</sup>                   | 3-Hydroxy-3-methylglutaric acid      | 4.589  | 0.008 | 1.863  |
| 372.00 | 191.0554 | (M-H) <sup>-</sup>                   | Quinate                              | 0.204  | 0.029 | 2.167  |
| 372.18 | 131.0466 | (M-H) <sup>-</sup>                   | L-Asparagine                         | 3.125  | 0.019 | 6.022  |
| 372.18 | 113.0357 | (M-H) <sup>-</sup>                   | Dihydrouacil                         | 3.168  | 0.019 | 3.922  |
| 372.18 | 114.0195 | (M-H) <sup>-</sup>                   | Maleamic acid                        | 2.863  | 0.021 | 2.503  |
| 386.74 | 117.0192 | (M-H) <sup>-</sup>                   | Succinate                            | 14.536 | 0.016 | 3.012  |
| 388.83 | 179.0567 | (M-H) <sup>-</sup>                   | myo-Inositol                         | 0.188  | 0.000 | 8.176  |
| 390.47 | 147.0293 | (M-H) <sup>-</sup>                   | Citramalic acid                      | 4.524  | 0.041 | 2.304  |
| 402.26 | 133.0149 | (M-H) <sup>-</sup>                   | L-Malic acid                         | 2.033  | 0.010 | 6.967  |
| 407.06 | 160.061  | (M-H) <sup>-</sup>                   | DL-2-Aminoadipic acid                | 15.155 | 0.031 | 2.155  |
| 410.14 | 503.1605 | (M-H) <sup>-</sup>                   | Raffinose                            | 0.273  | 0.001 | 1.301  |
| 416.88 | 175.0359 | (M+Na-2H) <sup>-</sup>               | 3,4-Dihydroxyphenyl ethanol          | 3.927  | 0.023 | 1.185  |
| 431.44 | 191.0193 | (M-H <sub>2</sub> O-H) <sup>-</sup>  | D-Glucarate                          | 4.051  | 0.016 | 1.910  |
| 432.47 | 209.0301 | (M-H) <sup>-</sup>                   | D-Galactarate                        | 38.381 | 0.041 | 4.961  |
| 440.29 | 173.0097 | (M-H) <sup>-</sup>                   | cis-Aconitate                        | 5.644  | 0.002 | 3.555  |



|        |        |          |                                        |                                                                               |        |       |        |
|--------|--------|----------|----------------------------------------|-------------------------------------------------------------------------------|--------|-------|--------|
| ESI(+) | 440.45 | 129.0193 | (M-H) <sup>-</sup>                     | Citraconic acid                                                               | 5.774  | 0.002 | 4.039  |
|        | 444.36 | 154.0615 | (M-H) <sup>-</sup>                     | L-Histidine                                                                   | 0.388  | 0.004 | 1.201  |
|        | 454.35 | 259.0218 | (M-H) <sup>-</sup>                     | alpha-D-Galactose 1-phosphate                                                 | 6.329  | 0.023 | 1.009  |
|        | 460.06 | 341.1072 | (M-H) <sup>-</sup>                     | Sucrose                                                                       | 0.326  | 0.000 | 1.105  |
|        | 504.01 | 191.0205 | (M-H) <sup>-</sup>                     | Citrate                                                                       | 30.281 | 0.008 | 13.654 |
|        | 37.67  | 322.2717 | (M+NH <sub>4</sub> ) <sup>+</sup>      | Arachidonic Acid (peroxide free)                                              | 8.556  | 0.018 | 1.337  |
|        | 52.51  | 147.0425 | (M+H-H <sub>2</sub> O) <sup>+</sup>    | 4-Hydroxycinnamic acid                                                        | 0.311  | 0.040 | 1.781  |
|        | 59.61  | 279.2303 | (M+H) <sup>+</sup>                     | alpha-Linolenic acid                                                          | 5.429  | 0.008 | 5.576  |
|        | 71.99  | 330.2623 | M <sup>+</sup>                         | Eicosapentaenoic Acid ethyl ester<br>(4Z,7Z,10Z,13Z,16Z,19Z)-4,7,10,13,16,19- | 3.161  | 0.002 | 5.173  |
|        | 74.15  | 328.2462 | M <sup>+</sup>                         | Docosaehaenoic acid                                                           | 1.937  | 0.003 | 1.544  |
|        | 109.79 | 247.1313 | (M+H-H <sub>2</sub> O) <sup>+</sup>    | Abscisic Acid (cis,trans)                                                     | 9.014  | 0.049 | 1.627  |
|        | 115.63 | 135.1151 | (M+H-H <sub>2</sub> O) <sup>+</sup>    | Perillyl alcohol                                                              | 14.204 | 0.004 | 1.786  |
|        | 121.75 | 153.1256 | (M+H-H <sub>2</sub> O) <sup>+</sup>    | Linalool oxide                                                                | 13.612 | 0.010 | 1.454  |
|        | 123.71 | 377.2142 | (M+K) <sup>+</sup>                     | (+)-8,9-DHET                                                                  | 5.687  | 0.036 | 1.512  |
|        | 126.01 | 302.304  | (M+H) <sup>+</sup>                     | Sphinganine                                                                   | 6.337  | 0.003 | 2.938  |
|        | 146.45 | 318.2992 | (M+H) <sup>+</sup>                     | Phytosphingosine                                                              | 13.958 | 0.001 | 8.876  |
|        | 153.65 | 417.1517 | (2M+H) <sup>+</sup>                    | 3,4-Dimethoxycinnamic acid                                                    | 15.424 | 0.001 | 1.019  |
|        | 154.34 | 277.2142 | (M+Na) <sup>+</sup>                    | cis-9-Palmitoleic acid                                                        | 9.044  | 0.012 | 2.662  |
|        | 156.85 | 295.2248 | (M+Na) <sup>+</sup>                    | 16-Hydroxypalmitic acid                                                       | 5.231  | 0.019 | 2.828  |
|        | 168.94 | 136.0604 | (M+H) <sup>+</sup>                     | Adenine                                                                       | 1.971  | 0.025 | 3.663  |
|        | 169.45 | 169.1205 | (M+H) <sup>+</sup>                     | Jasmine lactone                                                               | 5.855  | 0.006 | 1.536  |
|        | 182.08 | 265.1526 | (M+H) <sup>+</sup>                     | Phe-Val                                                                       | 7.228  | 0.002 | 1.003  |
|        | 184.17 | 245.1843 | (M+H) <sup>+</sup>                     | Ile-Leu                                                                       | 4.265  | 0.009 | 1.495  |
|        | 192.94 | 524.3673 | (M+H) <sup>+</sup>                     | 1-Stearoyl-2-hydroxy-sn-glycero-3-phosphocholine                              | 2.377  | 0.026 | 1.167  |
|        | 197.37 | 231.1685 | (M+H) <sup>+</sup>                     | Val-Ile                                                                       | 3.204  | 0.045 | 1.295  |
|        | 237.93 | 112.0493 | (M+H) <sup>+</sup>                     | Cytosine                                                                      | 4.019  | 0.002 | 3.476  |
|        | 237.93 | 244.0911 | (M+H) <sup>+</sup>                     | Cytidine                                                                      | 4.144  | 0.003 | 2.148  |
|        | 240.98 | 301.0707 | (M+H) <sup>+</sup>                     | Diosmetin                                                                     | 0.194  | 0.010 | 1.021  |
|        | 247.62 | 278.1493 | (M+CH <sub>3</sub> CN+Na) <sup>+</sup> | Pro-Val                                                                       | 1.817  | 0.038 | 2.397  |

|        |          |                                         |                                          |        |       |       |
|--------|----------|-----------------------------------------|------------------------------------------|--------|-------|-------|
| 253.66 | 186.0741 | (M+H-2H <sub>2</sub> O) <sup>+</sup>    | N-Acetyl-D-glucosamine                   | 4.400  | 0.011 | 1.185 |
| 256.31 | 203.0512 | (M-2H+3Na) <sup>+</sup>                 | Phenelzine                               | 0.202  | 0.001 | 4.347 |
| 260.37 | 152.0552 | (M+H) <sup>+</sup>                      | 2-Hydroxyadenine                         | 4.065  | 0.005 | 3.368 |
| 260.39 | 284.0968 | (M+H) <sup>+</sup>                      | Guanosine                                | 3.475  | 0.007 | 2.127 |
| 266.74 | 330.0578 | (M+H) <sup>+</sup>                      | Adenosine 2',3'-cyclic monophosphate     | 4.876  | 0.034 | 2.732 |
| 280.97 | 147.0429 | (M+H-H <sub>2</sub> O) <sup>+</sup>     | trans-3-Coumaric acid                    | 0.031  | 0.015 | 3.290 |
| 298.14 | 165.0537 | (M+H) <sup>+</sup>                      | trans-2-Hydroxycinnamic acid             | 0.201  | 0.030 | 4.270 |
| 298.19 | 182.0802 | (M+H) <sup>+</sup>                      | L-Tyrosine                               | 0.214  | 0.030 | 4.658 |
| 298.20 | 136.0747 | (M+H-H <sub>2</sub> O) <sup>+</sup>     | Dopamine                                 | 0.214  | 0.031 | 3.899 |
| 320.67 | 306.0467 | (M+H-H <sub>2</sub> O) <sup>+</sup>     | Cytidine 5'-monophosphate                | 4.154  | 0.009 | 1.271 |
| 322.21 | 346.0531 | (M+H) <sup>+</sup>                      | 3',5'-Cyclic guanosine monophosphate     | 5.211  | 0.035 | 2.443 |
| 331.47 | 288.2009 | (M+H) <sup>+</sup>                      | Ile-Arg                                  | 3.177  | 0.008 | 1.067 |
| 349.46 | 265.1107 | M <sup>+</sup>                          | Thiamine                                 | 1.973  | 0.016 | 2.240 |
| 355.43 | 146.0912 | (M+H) <sup>+</sup>                      | 4-Guanidinobutyric acid                  | 3.680  | 0.001 | 2.997 |
| 355.90 | 175.1061 | (M+H) <sup>+</sup>                      | N2-Acetyl-L-ornithine                    | 2.772  | 0.017 | 1.147 |
| 362.79 | 307.1005 | (M+H-2H <sub>2</sub> O) <sup>+</sup>    | Galactinol                               | 0.336  | 0.005 | 2.746 |
| 362.88 | 127.0373 | (M+H) <sup>+</sup>                      | 1,3,5-Benzenetriol                       | 0.341  | 0.005 | 2.815 |
| 362.88 | 360.1486 | (M+NH <sub>4</sub> ) <sup>+</sup>       | Sucrose                                  | 0.298  | 0.005 | 9.360 |
| 370.59 | 191.0385 | (M-H+2Na) <sup>+</sup>                  | L-Glutamine                              | 0.211  | 0.009 | 1.969 |
| 372.49 | 133.0598 | (M+H) <sup>+</sup>                      | L-Asparagine                             | 5.447  | 0.009 | 6.040 |
| 384.45 | 258.1097 | M <sup>+</sup>                          | Glycerophosphocholine                    | 10.274 | 0.023 | 6.404 |
| 389.66 | 176.0907 | (M+H) <sup>+</sup>                      | N-Carboxyethyl-.gamma.-aminobutyric acid | 4.437  | 0.018 | 2.330 |
| 398.52 | 84.04361 | (M+H-H <sub>2</sub> O) <sup>+</sup>     | 1-Aminocyclopropanecarboxylic acid       | 0.407  | 0.003 | 4.449 |
| 399.36 | 263.1337 | (M+H) <sup>+</sup>                      | Pro-Phe                                  | 3.036  | 0.013 | 1.984 |
| 401.86 | 304.1485 | (M+CH <sub>3</sub> COO+2H) <sup>+</sup> | Agomelatine                              | 7.507  | 0.001 | 2.392 |
| 401.94 | 147.075  | (M+NH <sub>4</sub> ) <sup>+</sup>       | L-Pyroglutamic acid                      | 0.355  | 0.004 | 6.122 |
| 403.37 | 276.1645 | (M+H) <sup>+</sup>                      | Thr-Arg                                  | 0.403  | 0.019 | 1.099 |
| 406.91 | 162.0753 | (M+H) <sup>+</sup>                      | DL-2-Aminoadipic acid                    | 15.862 | 0.011 | 3.769 |
| 413.59 | 246.1545 | (M+H) <sup>+</sup>                      | Arg-Ala                                  | 0.386  | 0.020 | 2.074 |
| 433.39 | 218.1481 | (M+H) <sup>+</sup>                      | Ala-Lys                                  | 0.289  | 0.021 | 1.554 |

|        |          |                                   |                                           |        |       |        |
|--------|----------|-----------------------------------|-------------------------------------------|--------|-------|--------|
| 433.62 | 343.1214 | (M+H) <sup>+</sup>                | alpha-Mannobiose                          | 0.352  | 0.034 | 1.242  |
| 437.89 | 232.1384 | (M+H) <sup>+</sup>                | Gly-Arg                                   | 0.395  | 0.047 | 1.018  |
| 448.19 | 277.1382 | (M+H) <sup>+</sup>                | L-Saccharopine                            | 10.473 | 0.029 | 2.906  |
| 448.90 | 272.1695 | (M+H) <sup>+</sup>                | Pro-Arg                                   | 0.433  | 0.046 | 1.214  |
| 457.94 | 365.1036 | (M+NH <sub>4</sub> ) <sup>+</sup> | 2'-Deoxyguanosine 5'-monophosphate (dGMP) | 0.214  | 0.001 | 2.655  |
| 458.63 | 277.1014 | (M+H) <sup>+</sup>                | gamma-L-Glutamyl-L-glutamic acid          | 16.283 | 0.032 | 1.923  |
| 471.69 | 184.0733 | (M+H) <sup>+</sup>                | Phosphorylcholine                         | 2.292  | 0.019 | 10.921 |

Rt <sup>a</sup>: retention time (sec); Fold change <sup>b</sup> was the ratio of average relative quantitation obtained from the diseased group (DS)/ control group (CS).

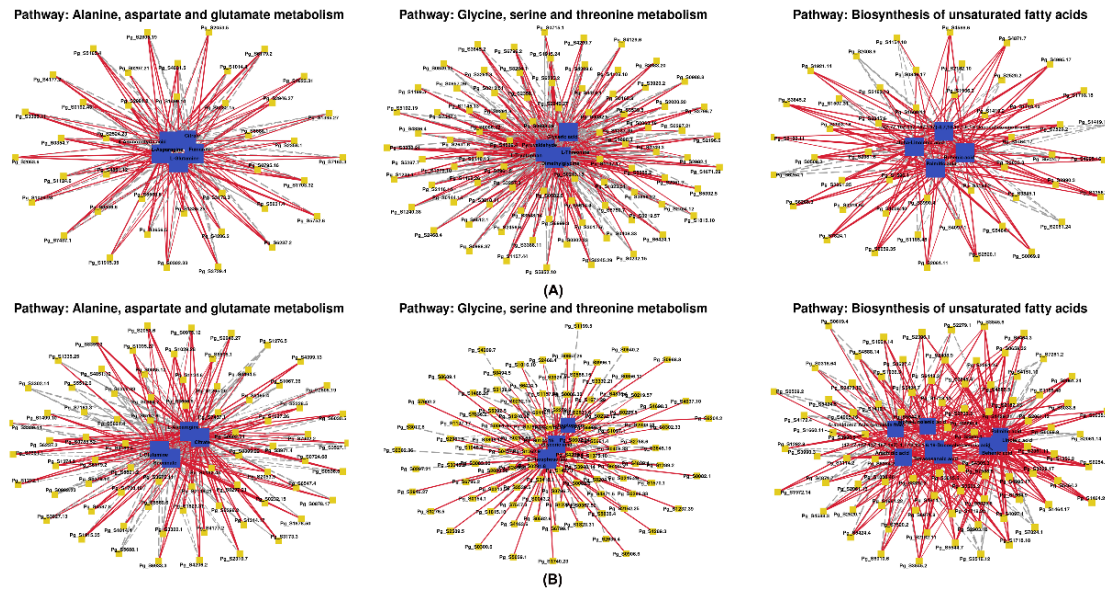

**Figure S1.** The network map of DRMs and DEGs in pathways of ginseng leaves (A) and stems (B). Blue squares represent the DRMs and yellow square represents DEGs, respectively. The correlation between DRMs and DEGs was calculated by the Pearson correlation coefficient and the positive correlation is shown by the red line, otherwise, it is indicated by the grey line.

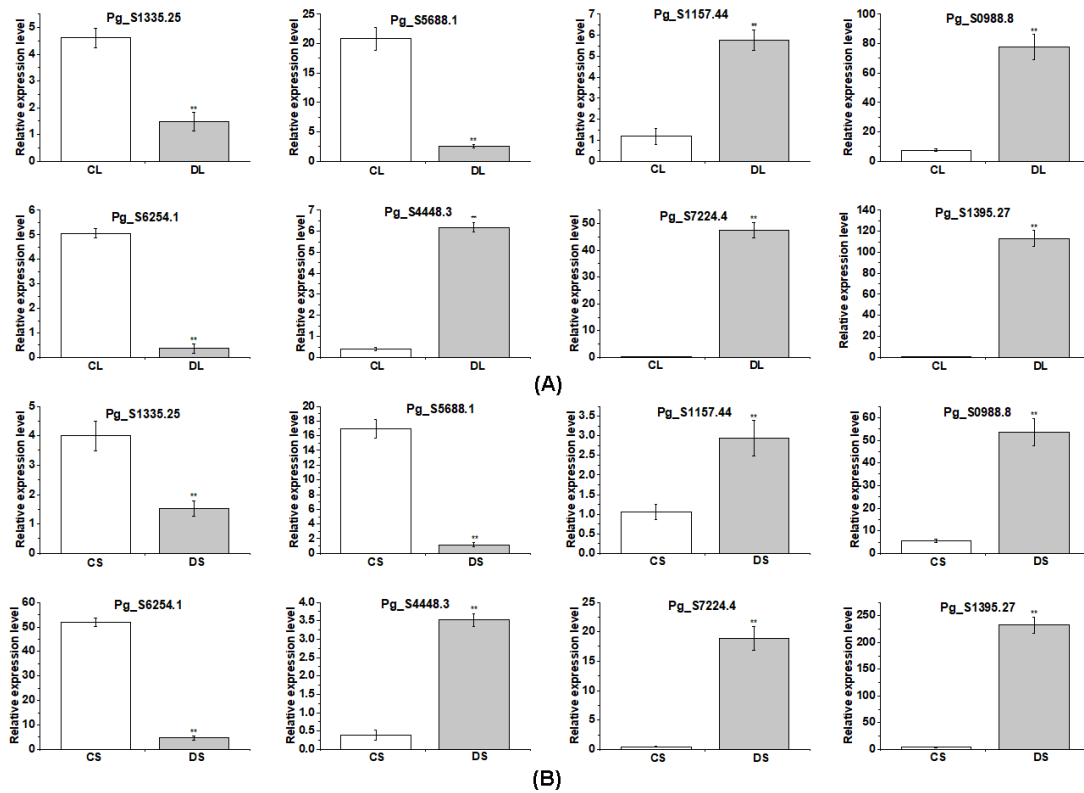

**Figure S2.** qRT-PCR validation for 8 differentially expressed genes induced by *P. cactorum* in ginseng leaves (A) and stems (B). \* and \*\* indicate significant differences with  $p < 0.05$  and  $p < 0.01$ , respectively. Data shown are the means and standard deviations of 3 biological replicates (n = 3).
